# Supplementary material
Source: Royal Society of Chemistry journal article supplement (doi:10.1039/d6ay00588h)
Supplement: d6ay00588h1.pdf [file d6ay00588h1.pdf]

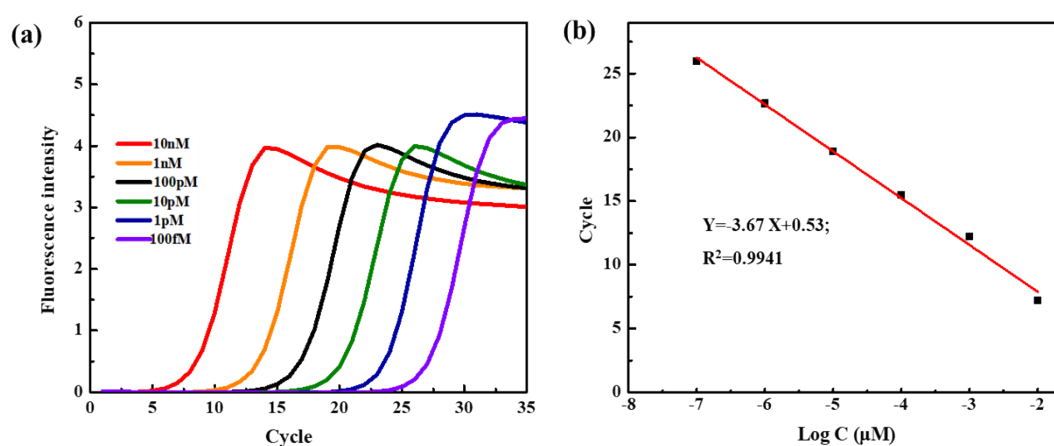

Figure S1 The standard curve plotting of library. (a) Amplification curves of Library at 10 nM, 1 nM, 100 pM, 10 pM, 1 pM and 100 fM, respectively; (b) Linear fitting graph between Ct values and logarithmic values of concentration for library.

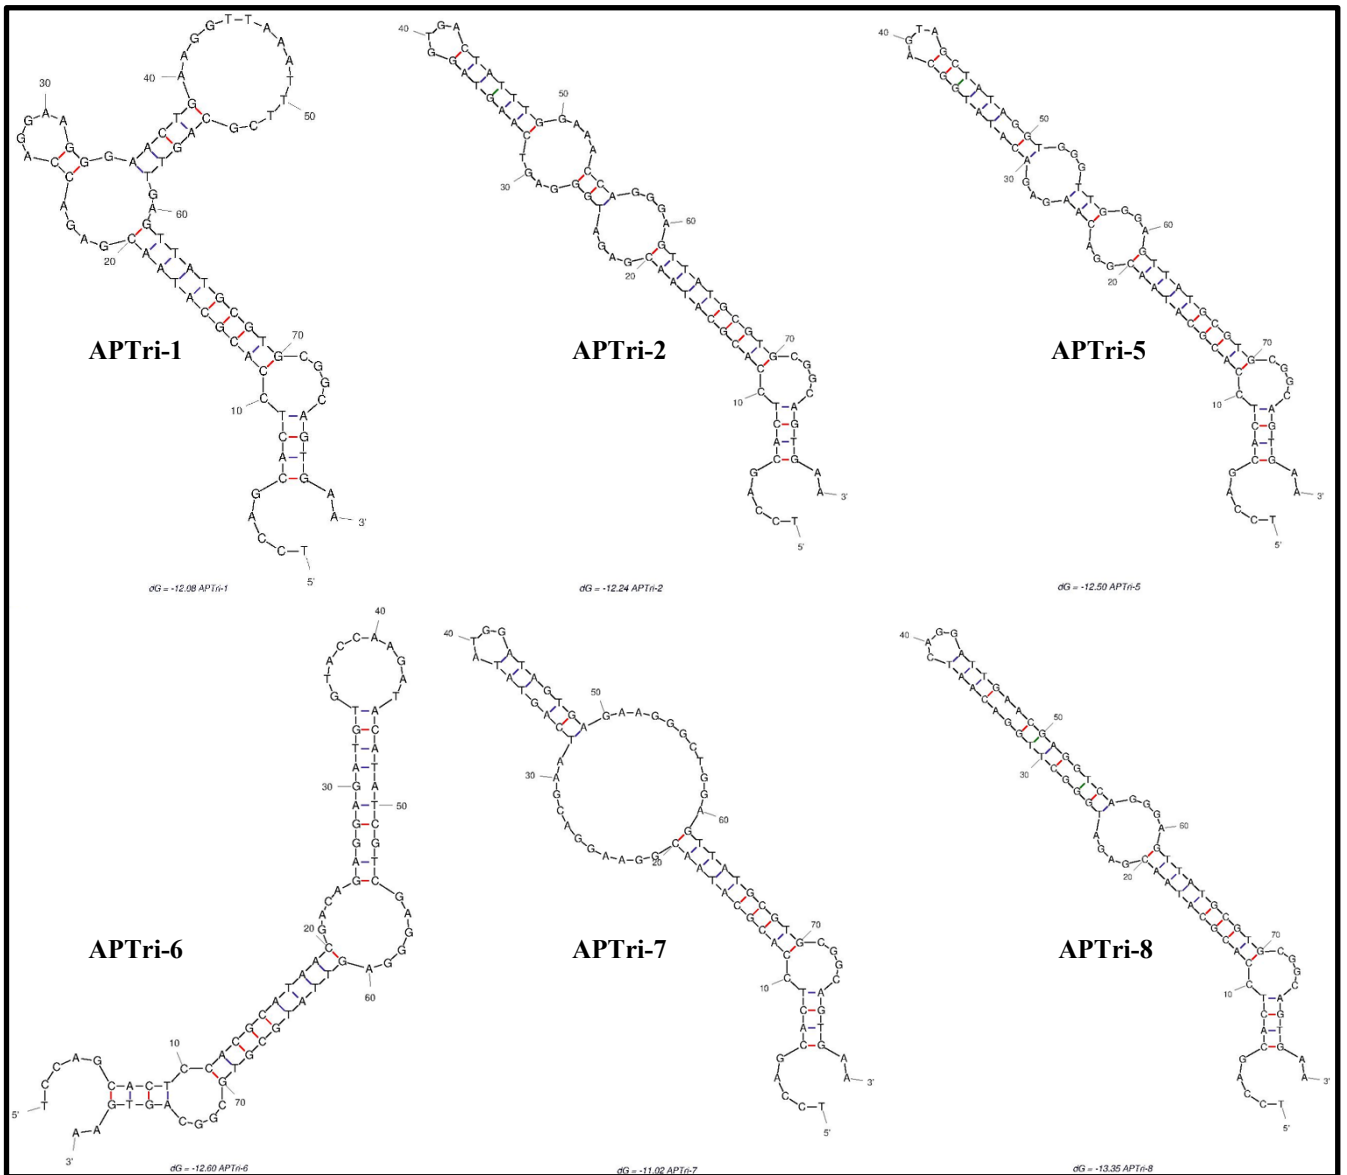

Figure S2 Secondary structure diagram of six candidate aptamers.

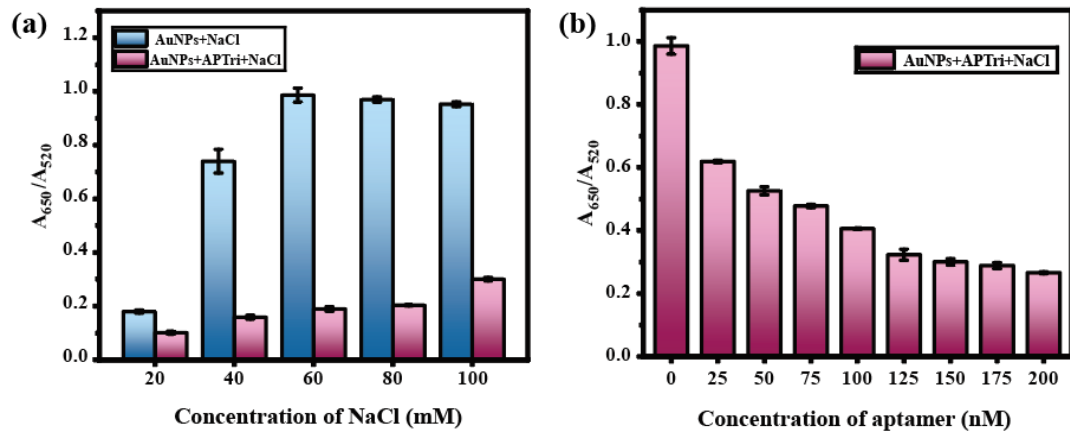

Figure S3 Optimization of experimental parameters for colorimetric assay using AuNPs. (a) Optimization of NaCl concentration; (b) Optimization of aptamer concentration.

**Table S1 List of DNA sequences**

| Name        | Sequence (5'→3')                                              |
|-------------|---------------------------------------------------------------|
| Library 3   | TCCAGCACTCCACGCATAAC-(N)40-GTTATGCGTGCGGCAGTGAA               |
| P5          | TCCAGCACTCCACGCATAAC                                          |
| P6          | TTCACTGCCGCACGCATAAC                                          |
| Lib3-biotin | GTTATGCGTGGAGTGCTGGA-biotin                                   |
| Lib3-polyA  | AAAAAAAAAAAAAAAAAAAAAAAAAAAAAA/iSp18/TTCACTGC<br>CGCACGCATAAC |
| Lib3-FAM    | FAM-TCCAGCACTCCACGCATAAC                                      |

**Table S2 Thirteen sequence information with the highest degree of enrichment**

| APTri-n  | Sequence information (5'→3')                                                          | $\Delta G$<br>(kcal/mol) |
|----------|---------------------------------------------------------------------------------------|--------------------------|
| APTri-1  | TCCAGCACTCCACGCATAACGAGACCAGGAAGGGAACTGAA<br>GGTTAAATTTTCGCAGTTGAGTTATGCGTGCGGCAGTGAA | -12.08                   |
| APTri-2  | TCCAGCACTCCACGCATAACGAGATGGGAGTCAAGTAGGTGA<br>CTATTTGGAAACCAGGGAGTTATGCGTGCGGCAGTGAA  | -12.24                   |
| APTri-3  | TCCAGCACTCCACGCATAACGACAGAGACACGATTGGCGAAA<br>AGCAATGGGGATGATGGAGTTATGCGTGCGGCAGTGAA  | -9.53                    |
| APTri-4  | TCCAGCACTCCACGCATAACGAGGGACGTAGACTGAAGGAAC<br>TGAGAGGGTATGGCGTGAGTTATGCGTGCGGCAGTGAA  | -9.12                    |
| APTri-5  | TCCAGCACTCCACGCATAACGACAAGAGACATATGGCAGTA<br>GCTATAGGTGGGTTGGGAGTTATGCGTGCGGCAGTGAA   | -12.50                   |
| APTri-6  | TCCAGCACTCCACGCATAACGACAGAGGAGATGTGTACCAAG<br>ATACATATCGTCGAGGGAGTTATGCGTGCGGCAGTGAA  | -12.60                   |
| APTri-7  | TCCAGCACTCCACGCATAACGGAAGGACGAATCAGTATATGG<br>ATAGTGAGAAGGGCTGGAGTTATGCGTGCGGCAGTGAA  | -11.02                   |
| APTri-8  | TCCAGCACTCCACGCATAACGAGATGGGCTTGGACAATCAGG<br>ATTGAACGAGGTCAGGGAGTTATGCGTGCGGCAGTGAA  | -13.35                   |
| APTri-9  | TCCAGCACTCCACGCATAACGGAGACGACAACAATAACAAGG<br>GGTATGGGAAGGAGATGTAGTTATGCGTGCGGCAGTGAA | -9.87                    |
| APTri-10 | TCCAGCACTCCACGCATAACGACAACGGAACACGATGGTTTT<br>AACAGAGAGGACCTTGGAGTTATGCGTGCGGCAGTGAA  | -11.49                   |
| APTri-11 | TCCAGCACTCCACGCATAACGACAGACAGCCAGAGATAGTTA<br>ATCCGTGTGGTGTGGAGTTATGCGTGCGGCAGTGAA    | -12.17                   |
| APTri-12 | TCCAGCACTCCACGCATAACGAAAGACCGAGACAGACCGATA<br>GTGATGTTGAGTTCTGGAGTTATGCGTGCGGCAGTGAA  | -9.35                    |
| APTri-13 | TCCAGCACTCCACGCATAACGAGCAGGCTCAGCTGAAATAGG<br>TTGAAGTGGGGTTGTGAGTTATGCGTGCGGCAGTGAA   | -10.30                   |
